# Supplementary material for: Serologic Evidence of Occupational Exposure to Avian Influenza Viruses at the Wildfowl/Poultry/Human Interface
Source: MDPI journal article supplement (doi:10.3390/microorganisms9102153), 2021-10-15
Supplement: s1 [file s1]

**Table S1.** Avian Influenza Viruses (AIVs) and antisera used for HI assays in birds reared in small-scale farms (Ravenna Province, Northern Italy, 2005- 2006).

| <b>Virus name<br/>abbreviation</b> | <b>Virus strain</b>                 | <b>Antiserum (production host)</b>  |
|------------------------------------|-------------------------------------|-------------------------------------|
| H1N1/05                            | A/Mallard/Italy/92151/05, H1N1*     | A/Mallard/Italy/625-21, H1N1 (C)    |
| H2N2/06                            | A/Guinea Fowl/Italy/52892/06, H2N2* | A/Duck/Germany/1215/73, H2N3 (R)    |
| H3N8/04                            | A/Mallard/Italy/241431/04, H3N8*    | A/Passeriformes/Italy/00, H3N8 (C)  |
| H4N6/05                            | A/Mallard/Italy/201649/05, H4N6*    | A/Mallard/Italy/239453/05, H4N6 (C) |
| H5N2/93                            | A/Mallard/Italy/80/93, H5N2         | A/Mallard/Italy/80/93, H5N2 (C)     |
| H5N9/97                            | A/Chicken/Italy/9097/97, H5N9*      | A/Chicken/Italy/9097/97, H5N9 (C)   |
| H6N5/72                            | A/Shearwater/Australia/72, H6N5     | A/turkey/Italy/1173/88, H6N2 (C)    |
| H7N1/99                            | A/Turkey/Italy/6423-1/99, H7N1*     | A/Turkey/Italy/2676/99, H7N1 (C)    |
| H7N3/01                            | A/Mallard/Italy/33/01, H7N3         | A/Turkey/Italy/7159/02, H7N3 (C)    |
| H8N4/68                            | A/Turkey/Ontario/6118/68, H8N4      | A/Turkey/Ontario/6118/68, H8N4 (R)  |
| H9N2/66                            | A/Turkey/Wisconsin/66, H9N2         | A/chicken/Italy/1227/86, H9N2 (C)   |
| H10N7/05                           | A/Mallard/Italy/166998/05, H10N7*   | A/Duck/Germany/N/49, H10N7 (R)      |
| H11N9/05                           | A/Mallard/Italy/48524/05, H11N9*    | A/Duck/Italy/309972/04, H11N9 (C)   |
| H12N5/76                           | A/Duck/Alberta/60/76, H12N5         | A/Duck/Alberta/60/76, H12N5 (R)     |
| H13N6/77                           | A/Gull/Maryland/704/77, H13N6       | A/Gull/Maryland/704/77, H13N6 (R)   |
| H14N5/82                           | A/Mallard/Ast/82, H14N5             | A/Mallard/Ast/82, H14N5 (R)         |

HI, hemagglutination inhibition; \*AIV isolated in the farms under study; C, chicken; R, rabbit.

**Table S2.** Avian Influenza Virus (AIV) strains isolated between 1997 and 2006 from birds under AIV surveillance in the study area (Ravenna Province, Northern Italy).

| <b>Virus strain</b>           | <b>AIV subtype</b> | <b>Isolation date</b> | <b>Bird<br/>Farm/Production<br/>categories</b> |
|-------------------------------|--------------------|-----------------------|------------------------------------------------|
| A/Chicken/Italy/9097/97       | H5N9 LPAI          | December 1997         | G                                              |
| A/Turkey/Italy/5563/99        | H7N1 LPAI          | 02/08/1999            | G                                              |
| A/Turkey/Italy/6423-1/99      | H7N1 LPAI          | 16/09/1999            | G                                              |
| A/Turkey/Italy/6423-2/99      | H7N1 LPAI          | 16/09/1999            | G                                              |
| A/Chicken /Italy/5823-2/99    | H7N1 LPAI          | 04/09/1999            | G                                              |
| A/Chicken /Italy/1427/00      | H7N1 <b>HPAI</b>   | 28/02/2000            | RF                                             |
| A/Chicken /Italy/1285/00      | H7N1 <b>HPAI</b>   | 28/02/2000            | RF                                             |
| A/Duck/Italy/284085/03        | H1N1               | 01/12/2003            | F-RW                                           |
| A/Duck/Italy/284090/03        | H1N1               | 01/12/2003            | F-RW                                           |
| A/Goose/Italy/296426/03       | H1N1               | 09/12/2003            | F-RW                                           |
| A/Duck/Italy/301777/03        | H3N8               | 12/12/2003            | D                                              |
| A/Duck/Italy/118380/04        | H1N1               | 21/05/2004            | D                                              |
| A/Mallard/Italy/185118/04     | H4N6               | 09/08/2004            | F-RW                                           |
| A/Duck/Italy/249176/04        | H4N2               | 28/10/2004            | F-RW                                           |
| A/Goose/Italy/249187/04       | H4N2               | 29/10/2004            | F-RW                                           |
| A/Mallard/Italy/241431/04     | H3N8               | 21/10/2004            | F-RW                                           |
| A/Goose/Italy/278359/04       | H11N9              | 29/11/2004            | F-RW                                           |
| A/Duck /Italy/48524/05        | H11N9              | 15/03/2005            | G                                              |
| A/Mallard /Italy/92151/05     | H1N1               | 26/04/2005            | F-RW                                           |
| A/Mallard/Italy/166998/05     | H10N7              | 25/07/2005            | F-RW                                           |
| A/Duck /Italy/188414/05       | H4N6               | 26/08/2005            | F-RW                                           |
| A/Mallard/Italy/201649/05     | H4N6               | 12/09/2005            | F-RW                                           |
| A/Guinea fowl/Italy 52892/06  | H2N2               | 10/03/2006            | D                                              |
| A/Mallard/Italy/215590/06     | H3N6               | 25/09/2006            | F-RW                                           |
| A/Mallard/Italy/215603/06     | H3N6               | 25/09/2006            | F-RW                                           |
| A/Guinea fowl/Italy/261861/06 | H4N6               | 10/11/2006            | D                                              |
| A/Guinea fowl/Italy 274975/06 | H4N6               | 20/11/2006            | D                                              |
| A/Guinea fowl/Italy 275040/06 | H4N6               | 20/11/2006            | D                                              |

LPAI, low-pathogenic avian influenza; **HPAI**, highly pathogenic avian influenza; G, grower; RF, rural farms; F-RW, free-range waterfowl; D, dealer

**Table S3.** Avian and human influenza viruses and antisera used for serological screening by HI assay and/or for MN confirmatory test in BEWs and Cs

| <b>Virus name abbreviation</b> | <b>Virus strain</b>                   | <b>Antiserum (production host)</b>    |
|--------------------------------|---------------------------------------|---------------------------------------|
| <i>Avian</i>                   |                                       |                                       |
| H1N1/05                        | A/Mallard/Italy/92151/05, H1N1*       | A/Mallard/Italy/625-21/2000, H1N1 (C) |
| H2N3/73                        | A/Duck/Germany/1215/73, H2N3          | A/Duck/Germany/1215/73, H2N3 (R)      |
| H3N8/04                        | A/Mallard/Italy/241431/04, H3N8*      | A/Passeriformes/Italy/00, H3N8 (C)    |
| H4N6/05                        | A/Mallard/Italy/201649/05, H4N6*      | A/Mallard/Italy/239453/05, H4N6 (C)   |
| H5N9/97                        | A/Chicken/Italy/9097/97, H5N9*        | A/Chicken/Italy/9097/97, H5N9 (C)     |
| H5N3/00                        | A/Mallard/Italy/208/00, H5N3          | A/Duck/Italy/26474/04, H5N3 (C)       |
| H5N1/05                        | A/Mallard/Italy/228090/05, H5N1       | A/Mallard/Italy/228090/05, H5N1 (C)   |
| H6N5/72                        | A/Shearwater/Australia/72, H6N5       | A/turkey/Italy/1173/88, H6N2 (C)      |
| H7N1/99                        | A/Turkey/Italy/6423-1/99, H7N1*       | A/Turkey/Italy/2676/99, H7N1 (C)      |
| H7N3/02                        | A/Turkey/Italy/214845/02, H7N3        | A/Turkey/Italy/7159/02, H7N3 (C)      |
| H8N4/68                        | A/Turkey/Ontario/6118/68, H8N4        | A/Turkey/Ontario/6118/68, H8N4 (R)    |
| H8N4/06                        | A/Mallard/Italy/UNIBO-399/06, H8N4    | A/Turkey/Ontario/6118/68, H8N4 (R)    |
| H9N8/03                        | A/Duck & Goose/Italy/332487/03, H9N8  | A/chicken/Italy/1227/86, H9N2 (C)     |
| H10N7/05                       | A/Mallard/Italy/166998/05, H10N7*     | A/Duck/Germany/N/49, H10N7 (R)        |
| H11N6/56                       | A/Duck/England/56, H11N6              | A/Duck/England/56, H11N6 (R)          |
| H11N9/00                       | A/Mallard/Italy/UNIBO-249-1/00, H11N9 | A/Duck/Italy/309972/04, H11N9 (C)     |
| H11N9/05                       | A/Mallard/Italy/48524/05, H11N9*      | A/Duck/Italy/309972/04, H11N9 (C)     |
| H12N5/76                       | A/Duck/Alberta/60/76, H12N5           | A/Duck/Alberta/60/76, H12N5 (R)       |
| H13N6/77                       | A/Gull/Maryland/704/77, H13N6         | A/Gull/Maryland/704/77, H13N6 (R)     |
| H14N5/82                       | A/Mallard/Ast/82, H14N5               | A/Mallard/Ast/82, H14N5 (R)           |
| <i>Human</i>                   |                                       |                                       |
| hu-H1N1/99                     | A/New Caledonia/20/99, H1N1           | A/New Caledonia/20/99, H1N1 (C)       |
| hu-H1N1/06                     | A/Solomon Islands/3/06, H1N1          | A/Solomon Islands/3/06, H1N1 (S)      |
| hu-H3N2/95                     | A/Nanchang/933/95, H3N2               | A/Nanchang/933/95, H3N2 (C)           |
| hu-H3N2/99                     | A/Moscow/10/99, H3N2                  | A/Moscow/10/99, H3N2 (C)              |
| hu-H3N2/04                     | A/California/7/04, H3N2               | A/California/7/04, H3N2 (C)           |
| hu-H3N2/05                     | A/Wisconsin/67/05, H3N2               | A/Wisconsin/67/05, H3N2 (C)           |

HI, haemagglutination inhibition assay; MN, microneutralization test; \*Avian influenza viruses isolated in the farms under study; BEWs, bird-exposed workers; Cs, controls non-exposed workers; C, chicken; R, rabbit; S, sheep.
